# Supplementary material
Source: publisher site journal article supplement (https://www.dovepress.com/article/250535)
Supplement: Supplementary file 1 [file get_supplementary_file.php]

**SUPPLEMENTARY MATERIALS**

**Comparative performance of estimation equations of kidney function in exceptional longevity: The Rugao Longevity and Ageing Study**

Authors:

**Mengjing Wang, MD, PhD1,3; Xuehui Sun, MS2; Li Ni, MD, PhD1; Minmin Zhang, MD, PhD1; Jiaying Zhang, MD4;Guoxin Ye, MD1; Li Jin, PhD2,3; Xiaofeng Wang, MD, PhD2,3;
 and Jing Chen, MD, PhD1,3**

Affiliations:

*1* *Nephrology, Huashan Hospital, Fudan University, Shanghai, China;*

*2* *State Key Laboratory of Genetic Engineering and Ministry of Education Key Laboratory of Contemporary Anthropology, School of Life Sciences, Fudan University, Shanghai, China;*

*3National Clinical Research Center for Aging and Medicine, Huashan Hospital, Fudan University, Shanghai, China*

*4Nutrition, Huashan Hospital, Fudan University, Shanghai, China;*

**Corresponding Author:**

Jing Chen, MD, PhD,

Email: chenjing1998@fudan.edu.cn

Xiaofeng Wang, MD, PhD,

Email: xiaofengwang71@163.com

**Supplementary Table s1** Baseline characteristics of included and excluded participants

| Variable | Included individuals | Excluded individuals | *P*-value |
| --- | --- | --- | --- |
| N=278 | N=185 |
| **Age (years)** | 97±2 | 97±2 | 0.741 |
| **Male (%)** | 64(23%) | 39(21%) | 0.623 |
| **Marriage (%)** |  |  |  |
| Married | 14(5.0%) | 9(4.9%) | 0.934 |
| Widowed | 261(93.9%) | 175(94.6%) | 0.750 |
| Divorced | 0% | 0% | - |
| Never married | 3(1.1%) | 1(0.5%) | 0.540 |
| **Education (%)** |  |  |  |
| Illiterate | 225(81.2%) | 153(83.2%) | 0.598 |
| Primary school | 37(13.4%) | 19(10.3%) | 0.329 |
| Middle School | 0 | 3(1.6%) | 0.033 |
| High School | 1(0.4%) | 1(0.5%) | 0.770 |
| University or college | 1(0.4%) | 1(0.5%) | 0.770 |
| Others | 13(4.7%) | 7(3.8%) | 0.646 |
| **Comorbidities (%)** |  |  |  |
| Hypertension | 45(16%) | 35(19%) | 0.467 |
| Cardiovascular disease | 13(5%) | 13(7%) | 0.286 |
| Cereberovascular disease | 8(3%) | 8(4%) | 0.404 |
| Chronic obstructive pulmonary disease | 25(9%) | 14(8%) | 0.600 |
| **ADL disability** |  |  |  |
| None | 125(45%) | 70(38%) | 0.140 |
| Moderate | 65(23%) | 51(28%) | 0.293 |
| Severe | 88(32%) | 63(34%) | 0.562 |
| **Smoking** | 29(10%) | 9(5%) | 0.033 |
| **Body mass index (kg/m2)** | 21.6±4.1 | 21.4±4.3 | 0.681 |
| **Systolic blood pressure** | 137.7±23.7 | 135.0±20.8 | 0.194 |
| **Laboratory variables** |  |  |  |
| White blood cells(10^9/L) | 5.4±1.7 | 5.5±1.6 | 0.642 |
| Hemoglobin (g/dL) | 127.1±21.0 | 130.5±18.3 | 0.071 |
| Albumin (mg/dL) | 40.97±3.82 | 44.38±5.07 | <0.0001 |
| Triglyceride (mmol/L) | 1.06±0.44 | 1.16±0.59 | 0.056 |
| Cholesterol (mmol/L) | 4.78±0.88 | 4.79±1.08 | 0.879 |
| Low-density lipoprotein cholesterol (mmol/L) | 2.57±0.68 | 2.38±0.69 | 0.004 |
| High-density lipoprotein cholesterol (mmol/L) | 1.37±0.34 | 1.39±0.35 | 0.673 |
| Uric acid (umol/L) | 275.5±96.5 | 291.6±88.9 | 0.080 |
| Sodium (mmol/L) | 140.6±4.5 | 140.7±3.5 | 0.909 |
| Calcium (mmol/L) | 2.10±0.11 | 1.96±0.20 | <0.0001 |
| Phosphorus (mmol/L) | 1.04±0.15 | 1.02±0.16 | 0.164 |

Note: Values expressed as mean ± SD or number (percent). Conversion factors for units: LDL-C and HDL-C in mmol/L to mg/dL, ×38.67; triglycerides in mmol/L to mg/dL, ×88.6; creatinine in µmol/L to mg/dl, ×0.01131; eGFR in ml/min/1.73m2 to mL/s/1.73 m2, ×0.01667

**Supplementary Table s2** Reclassification of estimated GFR (eGFR) categories by the CKD-EPI and BIS Equations, Stratified According to Death (yes or no) During short term Follow-up

|  | eGFR by EPI equation (mL/min/1.73 m2) | | | | |
| --- | --- | --- | --- | --- | --- |
|  | >=80 | 60~79 | 40~60 | <40 | Total |
| Participants who died |  |  |  |  |  |
| eGFR by BIS equation (mL/min/1.73 m2) |  |  |  |  |  |
| >=80 | 6 |  |  |  |  |
| 60~79 | 9 | 26 |  |  |  |
| 40~60 |  | 36 | 25 |  |  |
| <40 |  |  | 7 | 3 |  |
| Total |  |  |  |  | 112 |
| Participants who did not die |  |  |  |  |  |
| eGFR by BIS equation (mL/min/1.73 m2) |  |  |  |  |  |
| >=80 | 8 |  |  |  |  |
| 60~79 | 19 | 36 |  |  |  |
| 40~60 |  | 75 | 19 |  |  |
| <40 |  |  | 7 | 2 |  |
| Total |  |  |  |  | 166 |

Net reclassification improvement = (19+75+7)/166-(9+36+7)/112= 0.14, *P*=0.052

**Abbreviations:**CKD-EPI, Chronic Kidney Disease Epidemiology Collaboration; BIS, Berlin Initiative Study-1.

**Supplementary Table s3** Reclassification of eGFR categories by the CKD-EPI and MDRD Equations, Stratified According to Death (yes or no) During short term Follow-up

|  | eGFR by EPI equation (mL/min/1.73 m2) | | | | |
| --- | --- | --- | --- | --- | --- |
|  | >=80 | 60~79 | 40~60 | <40 | Total |
| Participants who died |  |  |  |  |  |
| eGFR by MDRD equation (mL/min/1.73 m2) |  |  |  |  |  |
| >=80 | 15 | 45 |  |  |  |
| 60~79 |  | 17 | 12 |  |  |
| 40~60 |  |  | 20 | 0 |  |
| <40 |  |  |  | 3 |  |
| Total |  |  |  |  | 112 |
| Participants who did not die |  |  |  |  |  |
| eGFR by MDRD equation (mL/min/1.73 m2) |  |  |  |  |  |
| >=80 | 27 | 69 |  |  |  |
| 60~79 |  | 42 | 6 |  |  |
| 40~60 |  |  | 20 | 1 |  |
| <40 |  |  |  | 1 |  |
| Total |  |  |  |  | 166 |

Net reclassification improvement = (45+12+0)/112-(69+6+1)/166=0.05, *P*=0.3

**Abbreviations:**CKD-EPI, Chronic Kidney Disease Epidemiology Collaboration; MDRD, Modification of Diet in Renal Disease Study.

**Supplementary Table s4** Reclassification of eGFR categories by the CKD-EPI and modified MDRD Equations, Stratified According to Death (yes or no) During short term Follow-up

|  | eGFR by EPI equation (mL/min/1.73 m2) | | | | |
| --- | --- | --- | --- | --- | --- |
|  | >=80 | 60~79 | 40~60 | <40 | Total |
| Participants who died |  |  |  |  |  |
| eGFR by modified MDRD equation (mL/min/1.73 m2) |  |  |  |  |  |
| >=80 | 15 | 61 | 1 |  |  |
| 60~79 |  | 1 | 28 |  |  |
| 40~60 |  |  | 3 | 2 |  |
| <40 |  |  |  | 1 |  |
| Total |  |  |  |  | 112 |
| Participants who did not die |  |  |  |  |  |
| eGFR by modified MDRD equation (mL/min/1.73 m2) |  |  |  |  |  |
| >=80 | 27 | 110 |  |  |  |
| 60~79 |  | 1 | 24 |  |  |
| 40~60 |  |  | 2 | 2 |  |
| <40 |  |  |  | 0 |  |
| Total |  |  |  |  | 166 |

Net reclassification improvement = (61+1+28+2)/112-(110+24+2)/166=0.002, *P*=0.5

**Abbreviations:**CKD-EPI, Chronic Kidney Disease Epidemiology Collaboration; MDRD, Modification of Diet in Renal Disease Study; BIS, Berlin Initiative Study-1.

**Supplementary Table s5** Reclassification of eGFR categories by the CKD-EPI and BIS Equations, Stratified According to Death (yes or no) During long term Follow-up

|  | eGFR by EPI equation (mL/min/1.73 m2) | | | | |
| --- | --- | --- | --- | --- | --- |
|  | >=80 | 60~79 | 40~60 | <40 | Total |
| Participants who died |  |  |  |  |  |
| eGFR by BIS equation (mL/min/1.73 m2) |  |  |  |  |  |
| >=80 | 13 |  |  |  |  |
| 60~79 | 26 | 58 |  |  |  |
| 40~60 |  | 98 | 42 |  |  |
| <40 |  |  | 14 | 5 |  |
| Total |  |  |  |  | 256 |
| Participants who did not die |  |  |  |  |  |
| eGFR by BIS equation (mL/min/1.73 m2) |  |  |  |  |  |
| >=80 | 1 |  |  |  |  |
| 60~79 | 2 | 4 |  |  |  |
| 40~60 |  | 13 | 2 |  |  |
| <40 |  |  |  | 0 |  |
| Total |  |  |  |  | 22 |

Net reclassification improvement = (2+13)/22-(26+98+14)/256= 0.14, *P*=0.4

**Abbreviations:**CKD-EPI, Chronic Kidney Disease Epidemiology Collaboration; BIS, Berlin Initiative Study-1.

**Supplementary Table s6** Reclassification of eGFR categories by the CKD-EPI and MDRD Equations, Stratified According to Death (yes or no) During long term Follow-up

|  | eGFR by EPI equation (mL/min/1.73 m2) | | | | |
| --- | --- | --- | --- | --- | --- |
|  | >=80 | 60~79 | 40~60 | <40 | Total |
| Participants who died |  |  |  |  |  |
| eGFR by MDRD equation (mL/min/1.73 m2) |  |  |  |  |  |
| >=80 | 39 | 103 |  |  |  |
| 60~79 |  | 53 | 18 |  |  |
| 40~60 |  |  | 38 | 1 |  |
| <40 |  |  |  | 4 |  |
| Total |  |  |  |  | 256 |
| Participants who did not die |  |  |  |  |  |
| eGFR by MDRD equation (mL/min/1.73 m2) |  |  |  |  |  |
| >=80 | 3 | 11 |  |  |  |
| 60~79 |  | 6 |  |  |  |
| 40~60 |  |  | 2 |  |  |
| <40 |  |  |  | 0 |  |
| Total |  |  |  |  | 22 |

Net reclassification improvement = (103+18+1)/256-11/22= -0.02, *P*=0.5

**Abbreviations:**CKD-EPI, Chronic Kidney Disease Epidemiology Collaboration; MDRD, Modification of Diet in Renal Disease Study.

**Supplementary Table s7** Reclassification of eGFR categories by the CKD-EPI and modified MDRD Equations, Stratified According to Death (yes or no) During long term Follow-up

|  | eGFR by EPI equation (mL/min/1.73 m2) | | | | |
| --- | --- | --- | --- | --- | --- |
|  | >=80 | 60~79 | 40~60 | <40 | Total |
| Participants who died |  |  |  |  |  |
| eGFR by modified MDRD equation (mL/min/1.73 m2) |  |  |  |  |  |
| >=80 | 39 | 154 | 1 |  |  |
| 60~79 |  | 2 | 50 |  |  |
| 40~60 |  |  | 5 | 4 |  |
| <40 |  |  |  | 1 |  |
| Total |  |  |  |  | 256 |
| Participants who did not die |  |  |  |  |  |
| eGFR by modified MDRD equation (mL/min/1.73 m2) |  |  |  |  |  |
| >=80 | 3 | 17 |  |  |  |
| 60~79 |  | 0 | 2 |  |  |
| 40~60 |  |  | 0 |  |  |
| <40 |  |  |  | 0 |  |
| Total |  |  |  |  | 22 |

Net reclassification improvement = (154+1+50+4)/256-(17+2)/22=-0.05, *P*=0.5

**Abbreviations:**CKD-EPI, Chronic Kidney Disease Epidemiology Collaboration; MDRD, Modification of Diet in Renal Disease Study.

**Supplementary Table s8**

Adjusted Hazard Ratio (95% CI) for short term (two-year), all-cause mortality according to estimated GFR (eGFR) determined by CKD-EPI or MDRD or BIS or modified MDRD Equations with C-index and AIC of the Cox model.

|  |  | Hazardsb ratio | 95% Confidence interval | | *P*a | C-index | AIC |
| --- | --- | --- | --- | --- | --- | --- | --- |
| eGFR (continuous) |  |  |  |  |  |  |  |
| by EPI equation | | 1.018 | 1.002 | 1.033 | 0.023 | 0.67 | 1168 |
| by MDRD equation | | 1.006 | 0.997 | 1.014 | 0.206 | 0.66 | 1171 |
| by BIS equation | | 1.011 | 0.995 | 1.029 | 0.176 | 0.66 | 1171 |
| by modified MDRD equation | | 1.005 | 0.998 | 1.011 | 0.206 | 0.66 | 1171 |
| eGFR (≥60 ml/min/1.73m2 as reference) | |  |  |  |  |  |  |
| by EPI equation (< 60ml/min/1.73m2) | | 1.97 | 1.28 | 3.02 | 0.002 | 0.67 | 1164 |
| by MDRD equation (< 60ml/min/1.73m2) | | 1.54 | 0.95 | 2.51 | 0.081 | 0.65 | 1170 |
| by BIS equation (< 60ml/min/1.73m2) | | 1.01 | 0.68 | 1.52 | 0.947 | 0.66 | 1173 |
| by modified MDRD equation (< 60ml/min/1.73m2) | | 1.91 | 0.82 | 4.43 | 0.134 | 0.65 | 1171 |

a Adjusted for following covariates: age, gender, marriage status, education, smoking, body mass index, systolic blood pressure, serum albumin, low-density lipoprotein cholesterol, activities of daily living, Hypertension, Cardiovascular disease, Cerebrovascular disease, Chronic obstructive pulmonary disease.

b every 1ml/min/1.73m2 decrease of GFR or compared to GFR≥60 ml/min/1.73m2

**Abbreviations:**CKD-EPI, Chronic Kidney Disease Epidemiology Collaboration; MDRD, Modification of Diet in Renal Disease Study; BIS, Berlin Initiative Study-1.

**Supplementary Table s9**

Adjusted Hazard Ratio (95% CI) for long term (six-year), all-cause mortality according to eGFR determined by CKD-EPI or MDRD or BIS or modified MDRD Equations with C-index and AIC of the Cox model.

|  |  | Hazardsb ratio | 95% Confidence interval | | *P*a | C-index | AIC |
| --- | --- | --- | --- | --- | --- | --- | --- |
| eGFR (continuous) |  |  |  |  |  |  |  |
| by EPI equation | | 1.013 | 1.002 | 1.025 | 0.022 | 0.63 | 2414 |
| by MDRD equation | | 1.004 | 0.998 | 1.010 | 0.167 | 0.62 | 2417 |
| by BIS equation | | 1.009 | 0.997 | 1.021 | 0.148 | 0.62 | 2417 |
| by modified MDRD equation | | 1.003 | 0.999 | 1.008 | 0.167 | 0.62 | 2417 |
| eGFR (≥60 ml/min/1.73m2 as reference) | |  |  |  |  |  |  |
| by EPI equation (< 60ml/min/1.73m2) | | 1.62 | 1.18 | 2.23 | 0.003 | 0.63 | 2410 |
| by MDRD equation (< 60ml/min/1.73m2) | | 1.33 | 0.93 | 1.89 | 0.119 | 0.62 | 2417 |
| by BIS equation (< 60ml/min/1.73m2) | | 0.95 | 0.73 | 1.25 | 0.728 | 0.62 | 2419 |
| by modified MDRD equation (< 60ml/min/1.73m2) | | 1.38 | 0.71 | 2.69 | 0.337 | 0.62 | 2418 |

a Adjusted for following covariates: age, gender, marriage status, education, smoking, body mass index, systolic blood pressure, serum albumin, low-density lipoprotein cholesterol, activities of daily living, Hypertension, Cardiovascular disease, Cerebrovascular disease, Chronic obstructive pulmonary disease.

b every 1ml/min/1.73m2 decrease of GFR or compared to GFR≥60 ml/min/1.73m2

**Abbreviations:**CKD-EPI, Chronic Kidney Disease Epidemiology Collaboration; MDRD, Modification of Diet in Renal Disease Study; BIS, Berlin Initiative Study-1.

**Supplementary Table s10**

**Comparison of variables before and after imputation.**

|  | Missing rate | Before imputation | After imputation | *P* |
| --- | --- | --- | --- | --- |
| Hypertention(%) | 0.40% | 16.25% | 16.47% | 0.925 |
| Body mass index (kg/m2) | 1% | 21.60±4.09 | 21.59±4.09 | 0.958 |
| Systolic blood pressure (mmHg) | 0.40% | 137.73±23.71 | 137.73±23.65 | 0.999 |
| Education(illiterate%) | 0.40% | 81.23% | 81.08% | 0.954 |

**Supplementary Figure s1** Cohort construction

463 long-lived individuals aged 95+

years in the Rugao longevity cohort

177 persons excluded for missing data on serum creatinine

286 long-lived individuals

7 persons excluded for being lost to follow-up during the study

Study cohort: 278 long-lived individuals

279 long-lived individuals

1 person excluded for being diagnosed as cancer during the recruitment of the cohort

**Supplementary Figure s2** The scatter plot of eGFRMDRD, eGFRBIS, and eGFRmodified-MDRD versus eGFREPI in Rugao longevity population


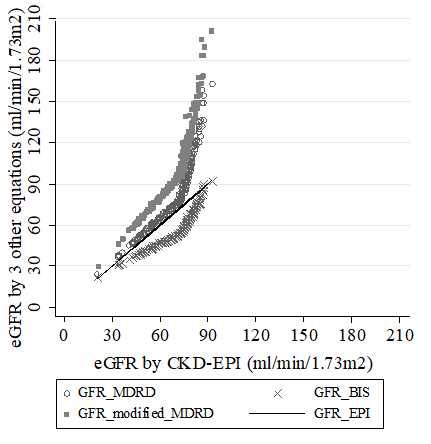


**Abbreviations:** CKD-EPI, Chronic Kidney Disease Epidemiology Collaboration; MDRD, Modification of Diet in Renal Disease Study; BIS, Berlin Initiative Study-1.
